# Supplementary material for: Enhanced superhydrophobic robustness of black silicon employing nanojungle structures
Source: Royal Society of Chemistry journal article supplement (doi:10.1039/d4nr04226c), 2025-01-01
Supplement: d4nr04226c1.pdf [file d4nr04226c1.pdf]

## Supplementary Information

### Enhanced Superhydrophobic Robustness of Black Silicon Employing Nanojungle Structures

Lingju Meng<sup>1,2,3\*</sup>, Mohammad Awashra<sup>2,3</sup>, Seyed Mehran Mirmohammadi<sup>2,3</sup>,  
Seyede Maryam Mousavi<sup>2</sup>, Jaana Vapaavuori<sup>2</sup>, Ville Jokinen<sup>2,3</sup>, and  
Sami Franssila<sup>2,3\*</sup>

<sup>1</sup>Department of Applied Physics, Aalto University, Espoo, Finland, 02150

<sup>2</sup>Department of Chemistry and Materials Science, Aalto University,  
Espoo, Finland, 02150

<sup>3</sup>Micronova Nanofabrication Centre, Aalto University, Espoo, Finland,  
02150

\*Corresponding author: lingju.meng@aalto.fi; sami.franssila@aalto.fi

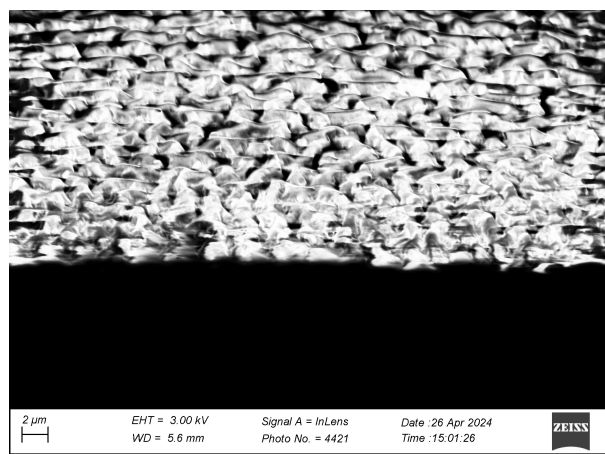

Photoresist film roughened for 5 mins

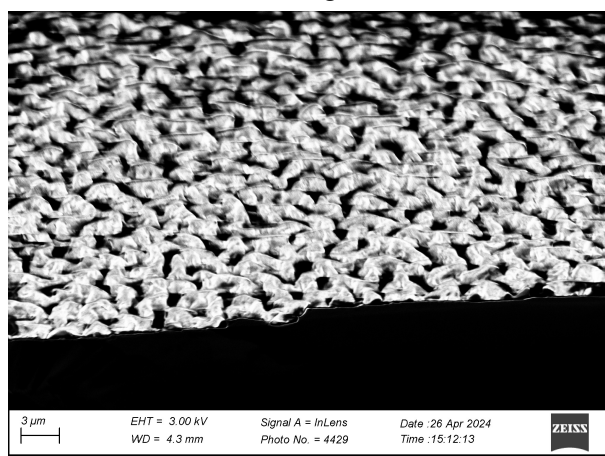

Photoresist film roughened for 10 mins

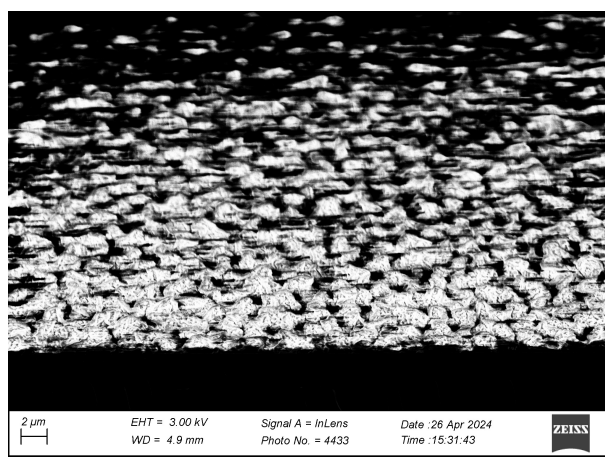

Photoresist film roughened for 30 mins

Figure S1: SEM micrographs of photoresist films roughened in RIE with different durations.

**Nanograss b-Si fabrication:**

The nanograss b-Si was fabricated with a cryogenic etching strategy on an ICP-RIE (Oxford Estrelas). The process temperature was  $-125^{\circ}\text{C}$  and  $\text{SF}_6$  (30 sccm) and  $\text{O}_2$  (15 sccm) were utilized. The etching chamber pressure was set to 5 mTorr. The ICP power was 1500 W, while the forward power was 10 W.

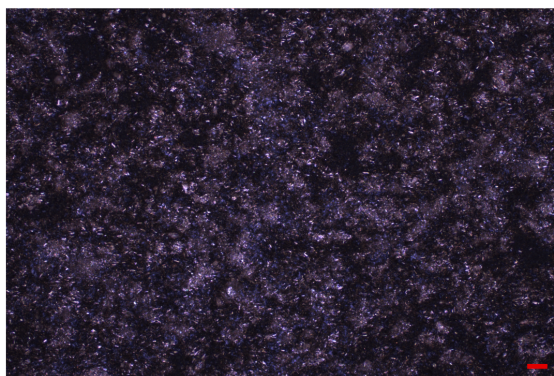

Nanojungle 20 cm impact

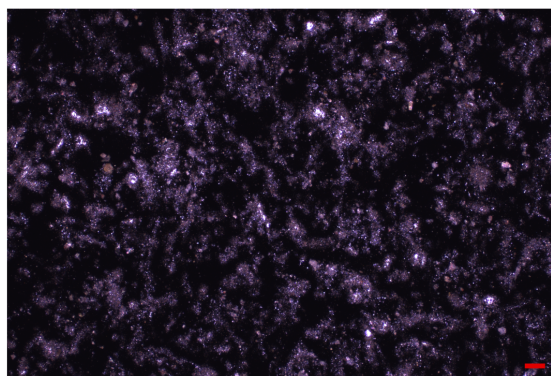

Nanograss 20 cm impact

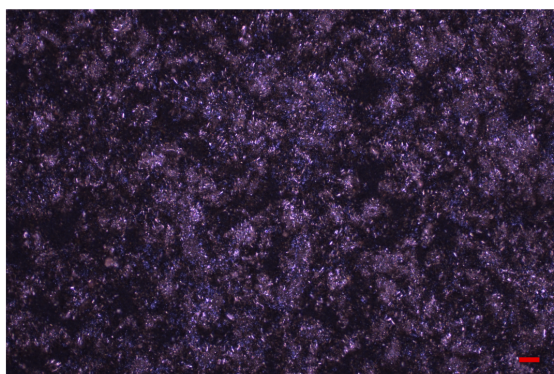

Nanojungle 30 cm impact

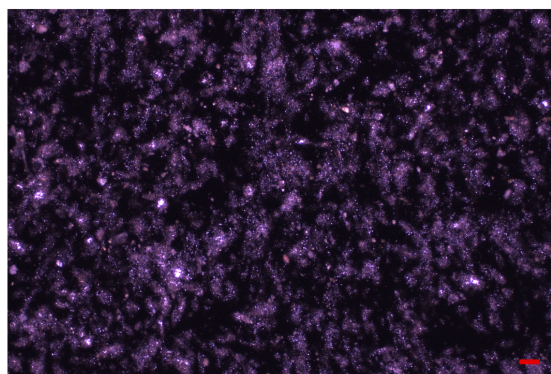

Nanograss 30 cm impact

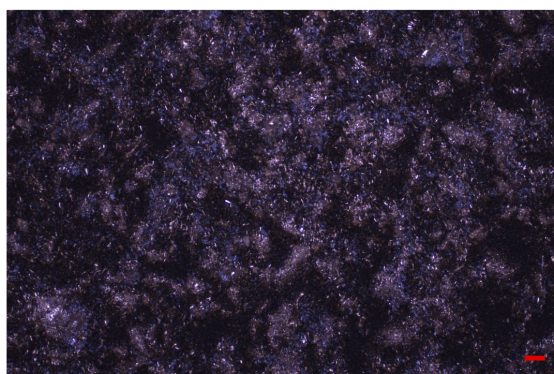

Nanojungle 30 cm impact

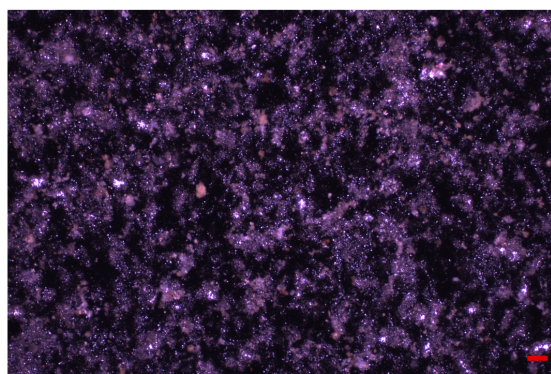

Nanograss 40 cm impact

Figure S2: Optical images of nanojungle and nanograss surfaces impacted by 10 g of sands from different heights. The scale bars are 100  $\mu\text{m}$ .



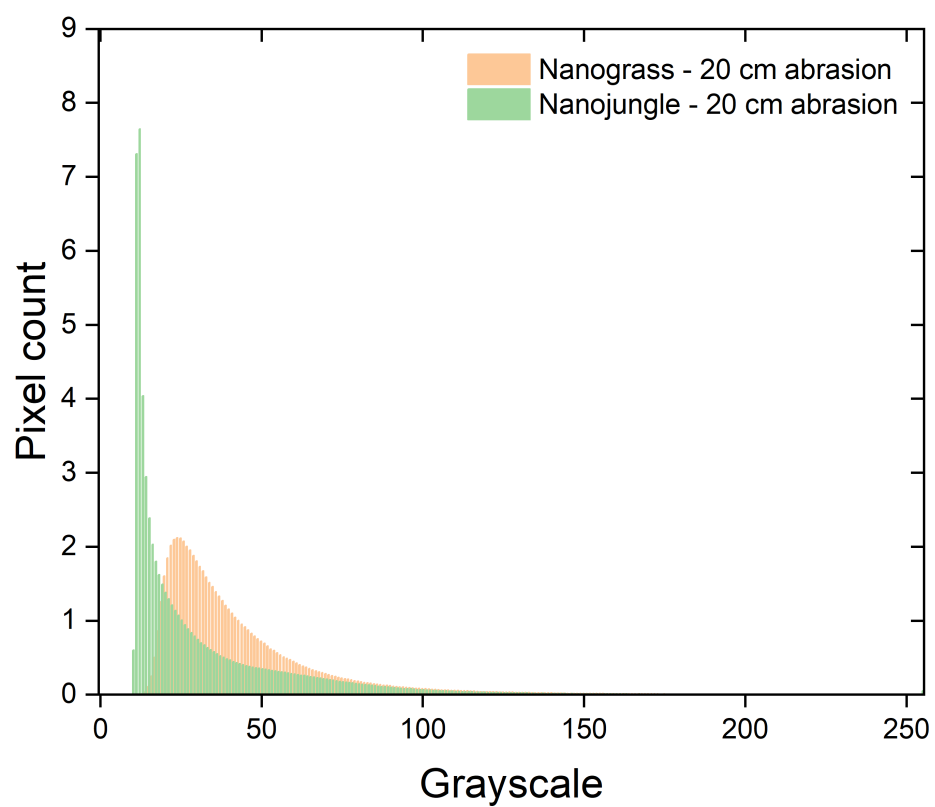

Figure S3: Pixel grayscale histograms of nanograss and nanojungle surface after impact of 10 g of sands from 20 cm.

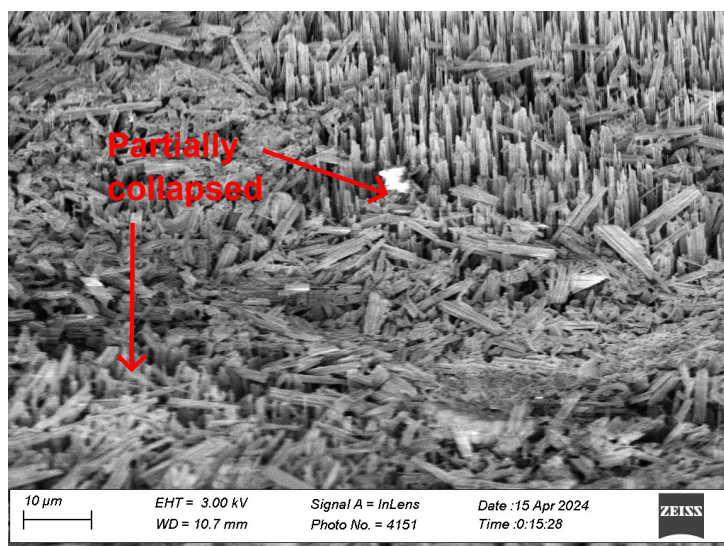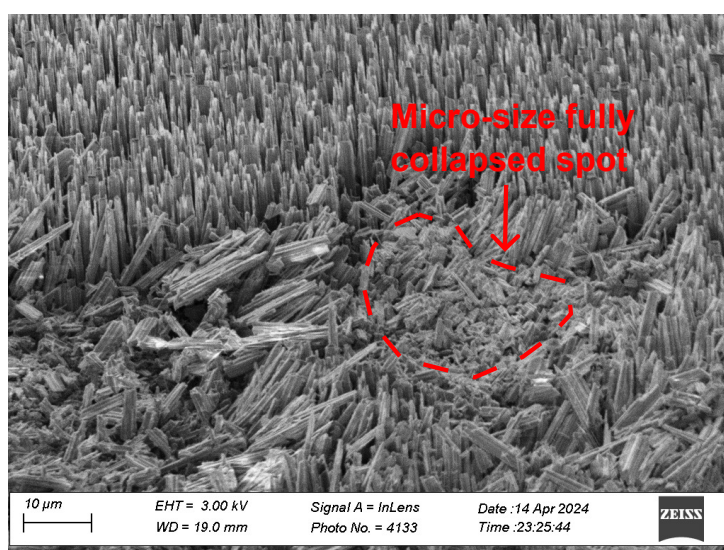

Figure S4: SEM micrographs examples of ‘partially collapsed’ spots and a ‘micro-size fully collapsed’ spot.

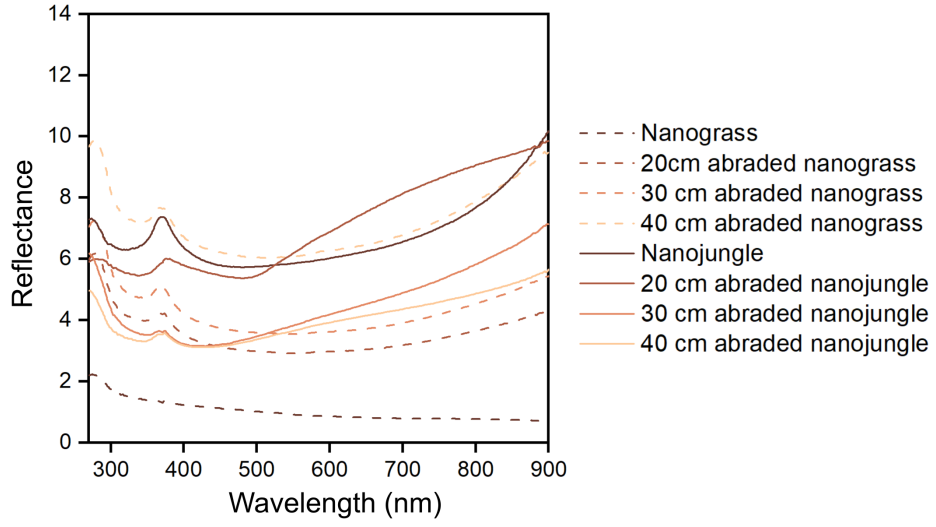

Figure S5: Reflectance spectra of nanograss and nanojungle b-Si surfaces after sand impact (10 g) from different heights.

The results were averaged from three sets of measurements. Reflectance was calculated using the following equation:

$$Reflectance(\%) = (R_2/R_1) * 100 \quad (S1)$$

where  $R_1$  represents the reflectance measured with a reference (white background) and  $R_2$  denotes the reflectance measured in the presence of the sample.

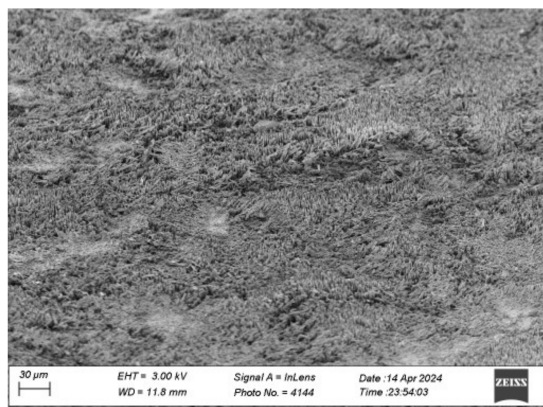

20 g impact

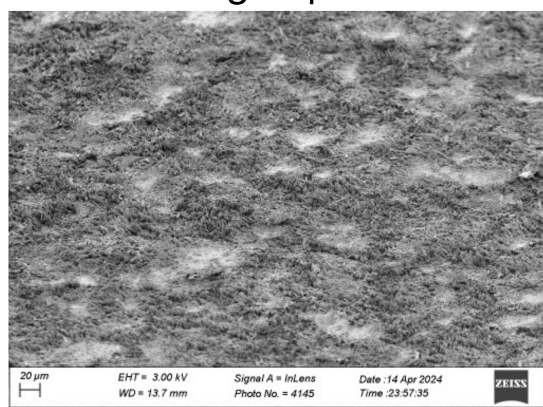

40 g impact

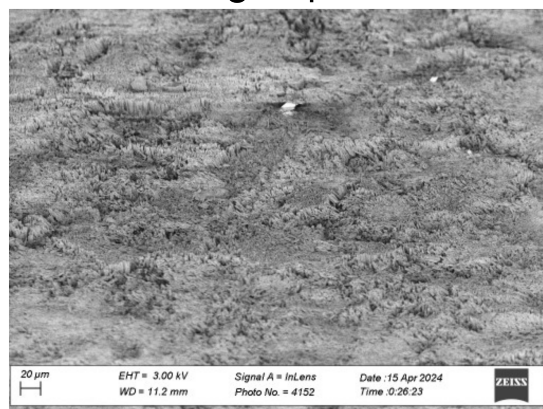

60 g impact

Figure S6: SEM micrographs of impacted nanojungle surfaces with different weights of sands.

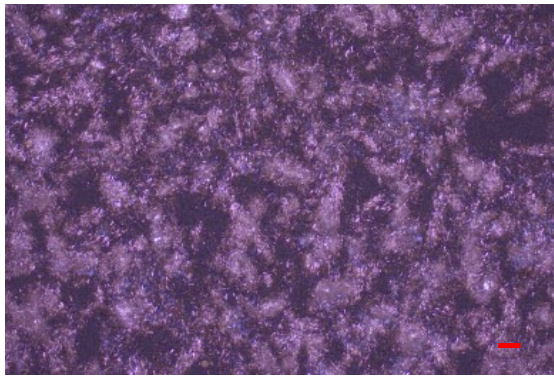

15 g impact

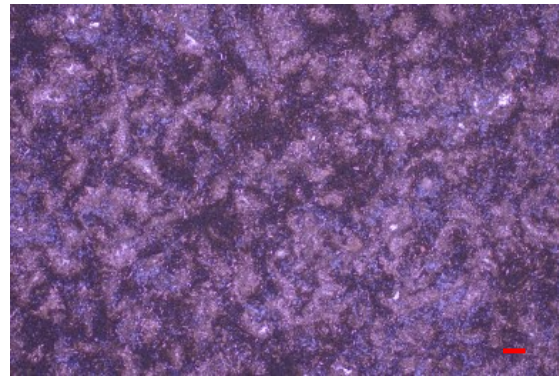

20 g impact

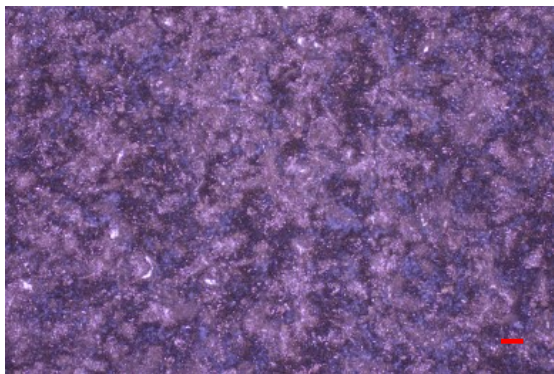

30 g impact

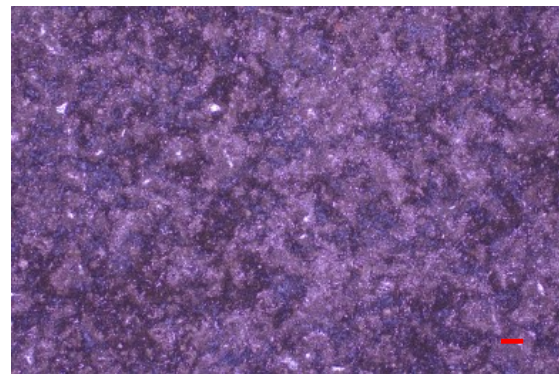

40 g impact

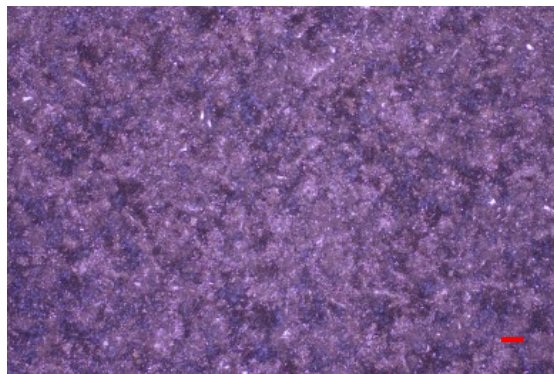

60 g impact

Figure S7: Optical images of impacted nanojungle surfaces with different weights of sands. The scale bars are 100  $\mu\text{m}$ .



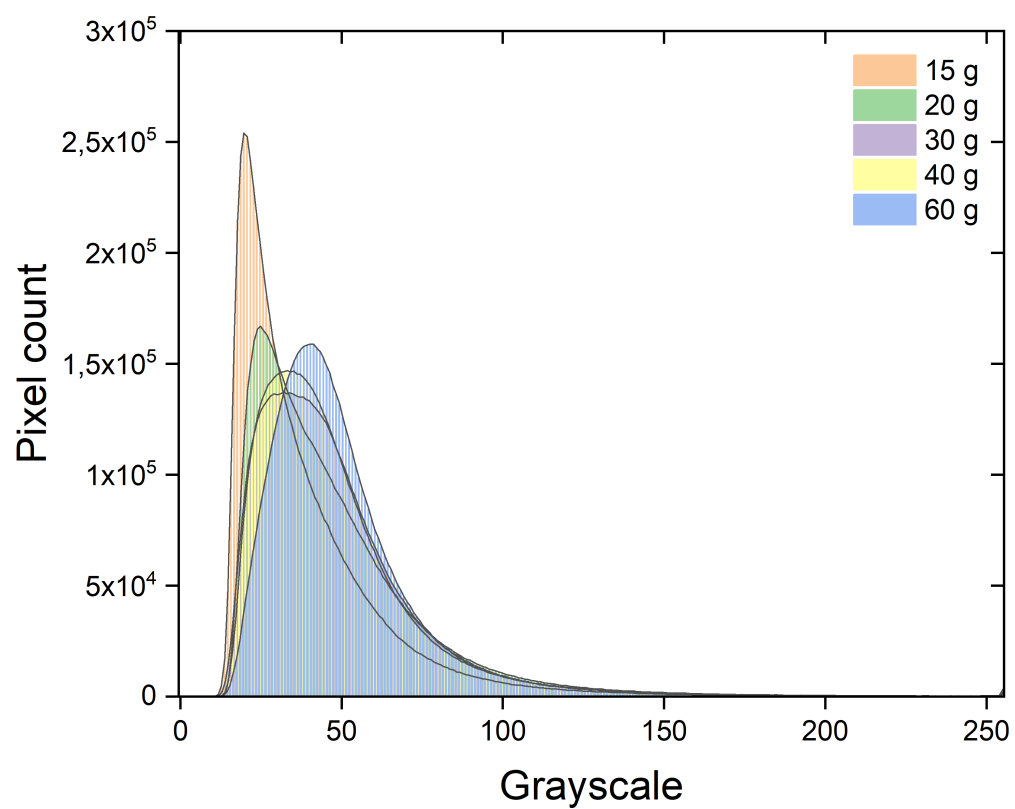

Figure S8: Pixel grayscale histogram of impacted nanojungle surfaces with different weights of sands.
